# Supplementary material for: Systematically profiling the expression of eIF3 subunits in glioma reveals the expression of eIF3i has prognostic value in IDH-mutant lower grade glioma
Source: Springer Nature journal article supplement (doi:10.1186/s12935-019-0867-1), 2019-06-04
Supplement: MOESM1 [file 16771664]

**Table S1 Clinicopathological features of patients used in this study**

|                                | CGGA dataset |            | TCGA dataset |            |
|--------------------------------|--------------|------------|--------------|------------|
|                                | Number       | Percentage | Number       | Percentage |
| <b>Total</b>                   | 272          | 100.00%    | 595          | 100.00%    |
| <b>Age</b>                     | 8-81 (43)    |            | 14-89 (47)   |            |
| <median                        | 128          | 47.06%     | 292          | 49.08%     |
| ≥ median                       | 144          | 52.94%     | 303          | 50.92%     |
| <b>Gender</b>                  |              |            |              |            |
| Female                         | 102          | 37.50%     | 248          | 41.68%     |
| Male                           | 170          | 62.50%     | 343          | 57.65%     |
| <b>Grade</b>                   |              |            |              | 0.00%      |
| II                             | 73           | 26.84%     | 211          | 35.46%     |
| III                            | 61           | 22.43%     | 235          | 39.50%     |
| IV                             | 138          | 50.74%     | 149          | 25.04%     |
| <b>IDH</b>                     |              |            |              |            |
| Mutation                       | 122          | 44.85%     | 373          | 62.69%     |
| Wildtype                       | 150          | 55.15%     | 222          | 37.31%     |
| <b>1p19q</b>                   |              |            |              |            |
| Codel                          | 29           | 10.66%     | 148          | 24.87%     |
| Non-codel                      | 243          | 89.34%     | 447          | 75.13%     |
| <b>Subgroups of WHO 2016</b>   |              |            |              |            |
| Oligo, IDH-mutant 1p/19q codel | 29           | 10.66%     | 148          | 24.87%     |
| Astro, IDH-mutant              | 60           | 22.06%     | 215          | 36.13%     |
| Astro, IDH-wildtype            | 45           | 16.54%     | 83           | 13.95%     |
| GBM IDH-mutant                 | 33           | 12.13%     | 10           | 1.68%      |
| GBM IDH-wildtype               | 105          | 38.60%     | 139          | 23.36%     |
| <b>TCGA subtype</b>            |              |            |              |            |
| Neural                         | 59           | 21.69%     | 36           | 6.05%      |
| Proneural                      | 81           | 29.78%     | 378          | 63.53%     |
| Classical                      | 68           | 25.00%     | 148          | 24.87%     |
| Mesenchymal                    | 64           | 23.53%     | 33           | 5.55%      |



**Figure S2. The expression of eIF3d/e/f/h/l in IDH-mutant and IDH-wildtype glioma patients with different gender.**

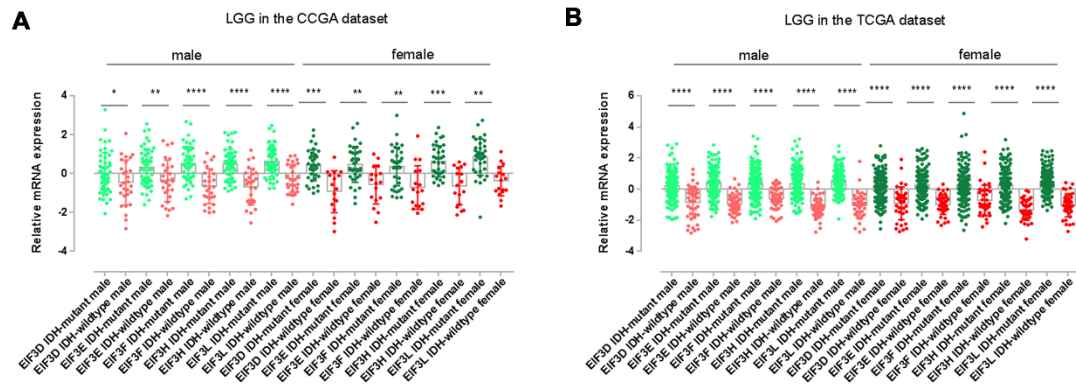

**(A-B)** Quantification data shows the expression levels of eIF3d/e/f/h/l in gliomas from the CCGA (A) and TCGA (B) datasets stratified by IDH status. \*  $P < 0.05$ , \*\*  $P < 0.01$ , \*\*\*  $P < 0.001$  and \*\*\*\*  $P < 0.0001$ .

**Figure S3. Relation between eIF3i expression and 1p/19q codeletion status in IDH-mutant LGG**

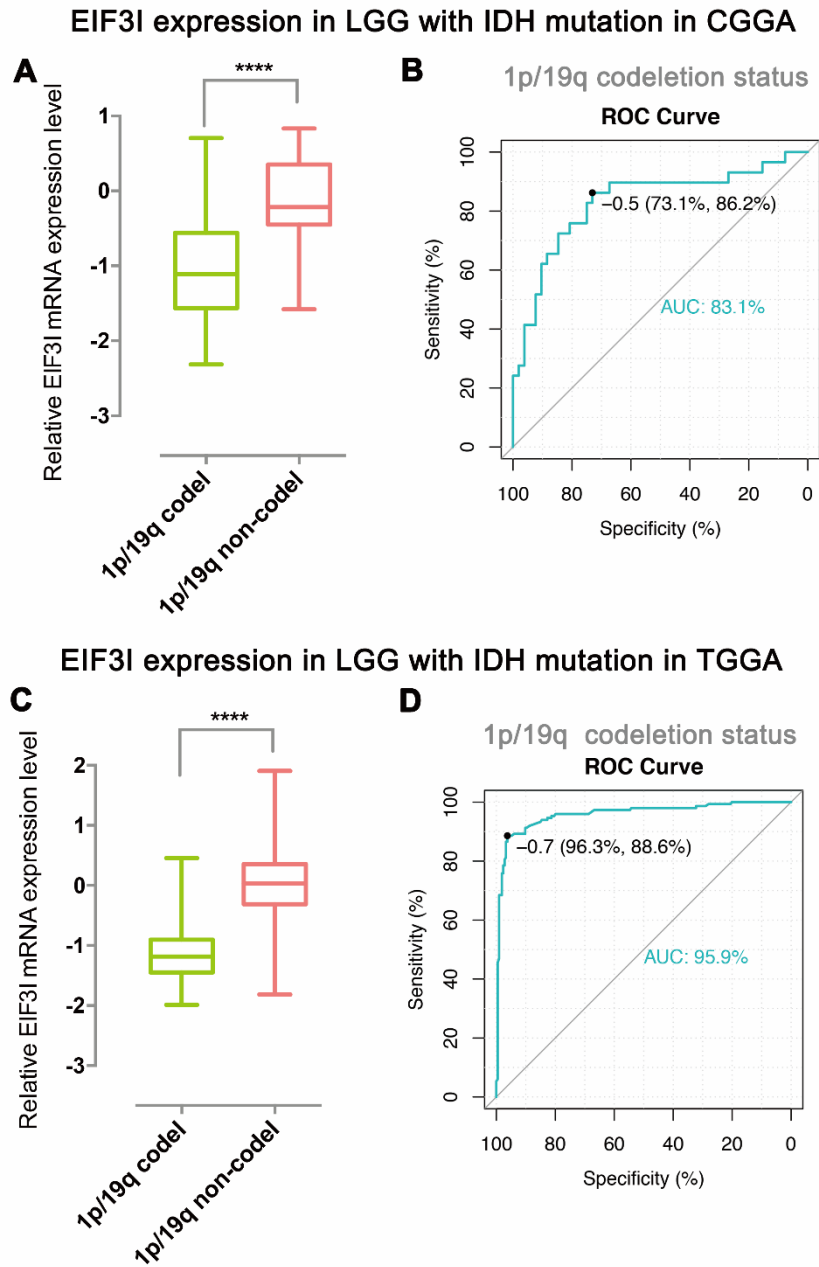

**(A and C)** Distribution of eIF3i in IDH mutant LGG stratified 1p/19q codeletion status from the CGGA (A) and TCGA (C) datasets. **(B and D)** ROC curves showed the predictive efficiency of the eIF3i expression on the 1p/19q codeletion status of IDH mutant LGG in CGGA (B) and TCGA (D) datasets.

**Figure S4. The prognostic value of eIF3i in total glioma, LGG and GBM, respectively.**

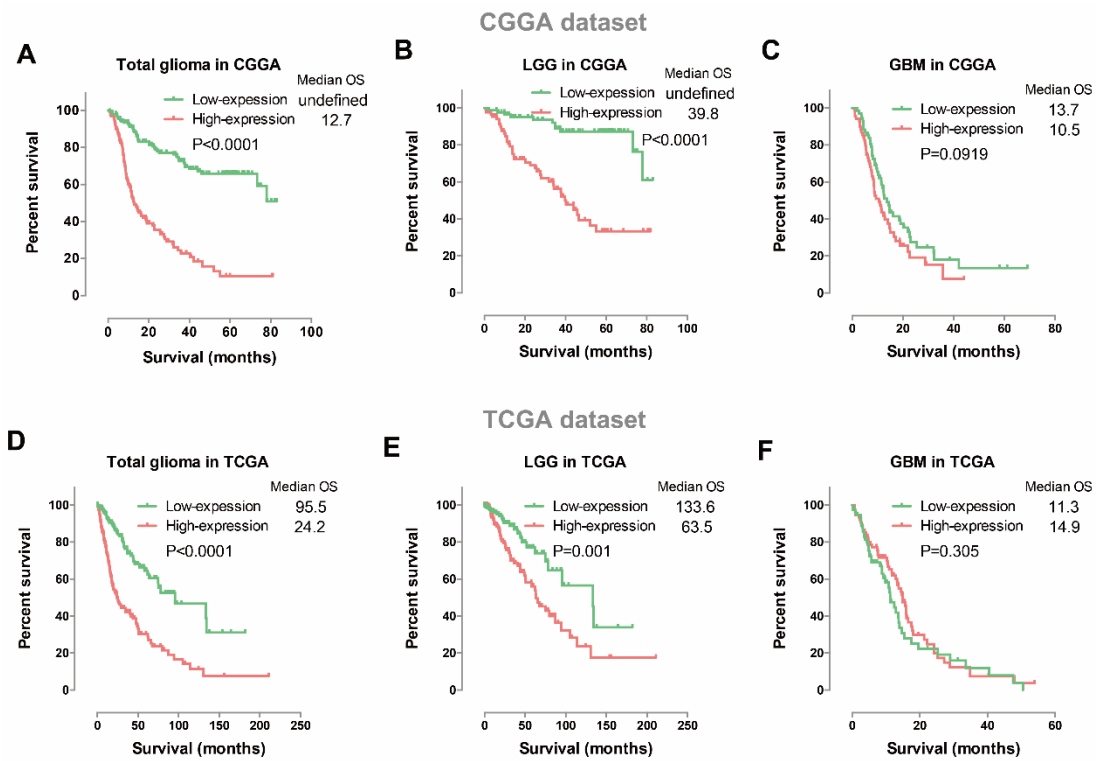

(A-F) Kaplan–Meier overall survival curves for patients stratified by the respective median expression of eIF3i in the CGGA (A-C) and TCGA (D-F) datasets with total gliomas (A and D), LGG (B and E), and GBM (C and F), respectively.

**Figure S5. The prognostic value of eIF3i in stratified GBM.**

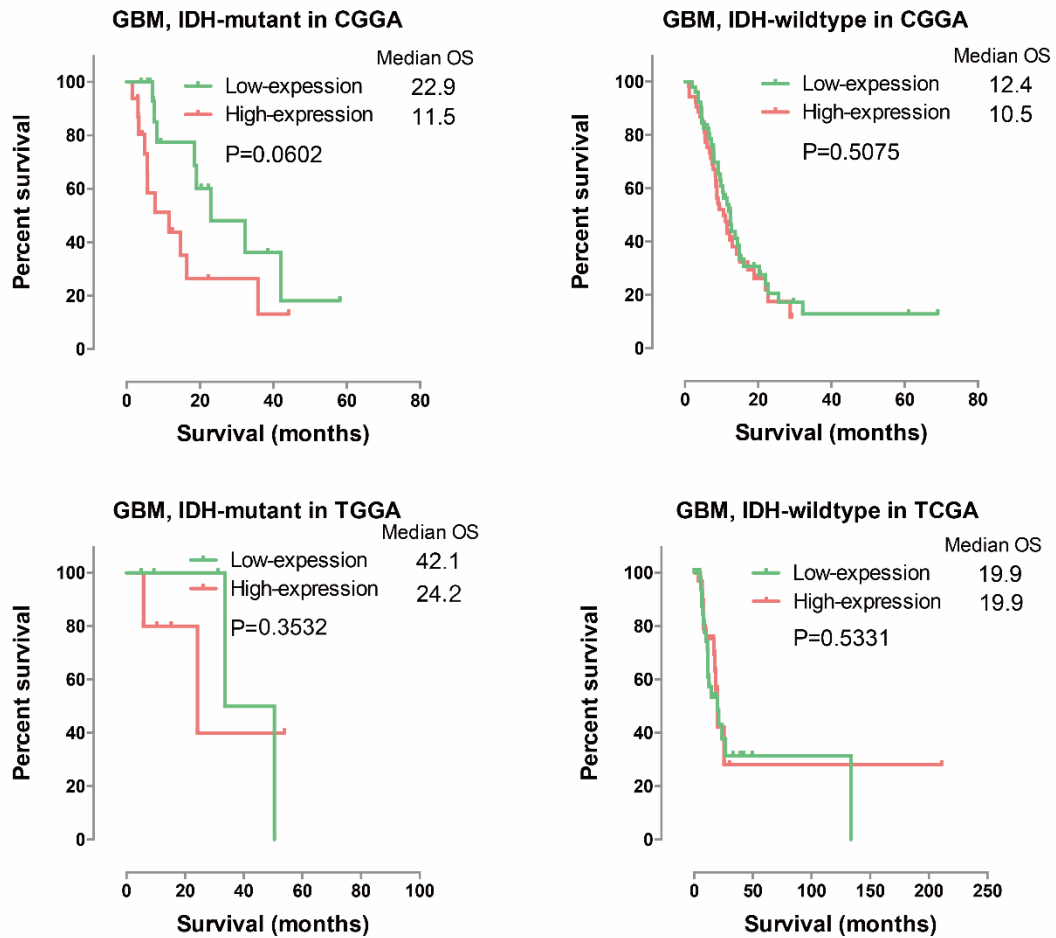

Kaplan–Meier overall survival curves for patients stratified by the respective median expression of eIF3i in the CGGA and TCGA datasets with IDH-mutant GBM and IDH-wildtype IDH, respectively.
